# Supplementary material
Source: publisher site journal article supplement (https://www.dovepress.com/article/384967)
Supplement: Supplementary file 1 [file get_supplementary_file.php]

Please select only one answer option (x). If several answers are possible, this will be indicated separately.

1. Please select your sex, or the gender you identify as?

- male                       female                       non-binary

2. Please select your age bracket?

- under 20  
 20 – 30                       51 – 60  
 31 – 40                       61 – 70  
 41 – 50                       over 70

3. In your opinion, who qualifies as the most skilled urologist?

- Resident  
 Resident with academic degree (e.g. PhD)  
 Specialist  
 Senior physician  
 Professor  
 Chief physician  
 Academic degree is not important

4. Do you want to be treated by the same doctor at every visit?

- Yes  
 No  
 That is not important for me.

5. Please select the reason for your consultation today:

- acute complaints/problem  
 preventive check-up  
 follow-up examination  
 scheduled procedure/surgery  
 other

6. Have you seen a urologist in the last 3 months?

- yes                                       no

If yes, please refer to your last visit and select an answer:

- I have had a positive experience with a female urologist.  
 I have had a positive experience with a male urologist.  
 I have had a negative experience with a female urologist.  
 I have had a negative experience with a male urologist.

7.1. I currently have complaints (multiple answers possible) regarding...

- the kidneys  
 the bladder  
 the prostate  
 storage or voiding  
 the penis (including erectile dysfunction)  
 sexually transmitted diseases (STD)  
 other

7.2. The current complaints are...

- embarrassing  
 restricting my daily activities  
 worrisome  
 painful

8. Please assume being in one of the following situations, regarding a hypothetical urological consultation, and select the preferred gender of your treating urologist, or no preference. Please select only one answer per consultation scenario (1-4) (x).

| <b>Consultation scenario</b>                     | female<br>urologist      | male<br>urologist        | no<br>preference         |
|--------------------------------------------------|--------------------------|--------------------------|--------------------------|
| (1) Consultation only                            | <input type="checkbox"/> | <input type="checkbox"/> | <input type="checkbox"/> |
| (2) Physical examination                         | <input type="checkbox"/> | <input type="checkbox"/> | <input type="checkbox"/> |
| (3) Outpatient procedure (without hospital stay) | <input type="checkbox"/> | <input type="checkbox"/> | <input type="checkbox"/> |
| (4) Surgical procedure (with hospital stay)      | <input type="checkbox"/> | <input type="checkbox"/> | <input type="checkbox"/> |

9. In the following, there are attributes listed referring to a hypothetical, unspecified consultation scenario. Please complete the following sentences and check (x) the box that most resonates with you:

"In my opinion ...

| a female<br>urologist    | a male<br>urologist      | no<br>preference         | End of sentence                                                |
|--------------------------|--------------------------|--------------------------|----------------------------------------------------------------|
| <input type="checkbox"/> | <input type="checkbox"/> | <input type="checkbox"/> | ...understands my body better."                                |
| <input type="checkbox"/> | <input type="checkbox"/> | <input type="checkbox"/> | ...is calmer."                                                 |
| <input type="checkbox"/> | <input type="checkbox"/> | <input type="checkbox"/> | ...is more empathetic."                                        |
| <input type="checkbox"/> | <input type="checkbox"/> | <input type="checkbox"/> | ...is more professional."                                      |
| <input type="checkbox"/> | <input type="checkbox"/> | <input type="checkbox"/> | ...takes more time / is less in a hurry."                      |
| <input type="checkbox"/> | <input type="checkbox"/> | <input type="checkbox"/> | ...has better practical skills."                               |
| <input type="checkbox"/> | <input type="checkbox"/> | <input type="checkbox"/> | ...takes a more solution-oriented approach to my complaints"   |
| <input type="checkbox"/> | <input type="checkbox"/> | <input type="checkbox"/> | ...doesn't put me under pressure when making a decision."      |
| <input type="checkbox"/> | <input type="checkbox"/> | <input type="checkbox"/> | ...is less dominant and respects my decision."                 |
| <input type="checkbox"/> | <input type="checkbox"/> | <input type="checkbox"/> | ...is better able to talk to me about my personal complaints." |

10. Please select your insurance status?

- statutory health insurance  
 private health insurance

11. Please select your highest level of general education?

- Non specified  
 secondary school  
 High school  
 A-levels or equivalent

12. Were you born in Germany?

- yes  no

13. Do you have German citizenship?

- yes  no

14. Is German your native language?

- yes  no

15. Please select your denomination, or religion you identify with? (Answering the question is optional)

- Christian
- Jewish
- Islamic
- Buddhist
- Hindu
- Other religion, denomination, or belief
- No religion, denomination, or belief
- Not specified

16. Please select your current employment status.

- full-time
- part-time basis
- currently on sick leave
- unemployed (e.g. stay-at-home mom/dad, student, retired, etc.)
- unemployed but looking for work

17. Please select your current marital status.

- single
- in a relationship
- divorced / separated
- widowed (or surviving partner)
